# Supplementary material for: Perceptual rivalry with vibrotactile stimuli
Source: Springer Nature journal article supplement (doi:10.3758/s13414-021-02278-1), 2021-04-22

1  
2  
3  
4  
5  
6  
7  
8  
9  
10  
11  
12  
13  
14  
15  
16  
17  
18  
19  
20  
21  
22  
23  
24  
25  
26  
27  
28  
29  
30  
31  
32  
33  
34  
35  
36  
37  
38  
39  
40  
41  
42  
43  
44  
45  
46  
47  
48  
49  
50  
51  
52  
53  
54  
55  
56  
57  
58  
59  
60

|                                                                  |
|------------------------------------------------------------------|
| <b>Noname manuscript No.</b><br>(will be inserted by the editor) |
|------------------------------------------------------------------|

---

## Supplementary material

Farzaneh Darki · James Rankin

Received: date / Accepted: date

For Review Only

---

F. Darki  
Department of Mathematics, College of Engineering, Mathematics & Physical Sciences,  
University of Exeter  
E-mail: fd303@exeter.ac.uk

J. Rankin  
Department of Mathematics, College of Engineering, Mathematics & Physical Sciences,  
University of Exeter

2

Farzaneh Darki, James Rankin

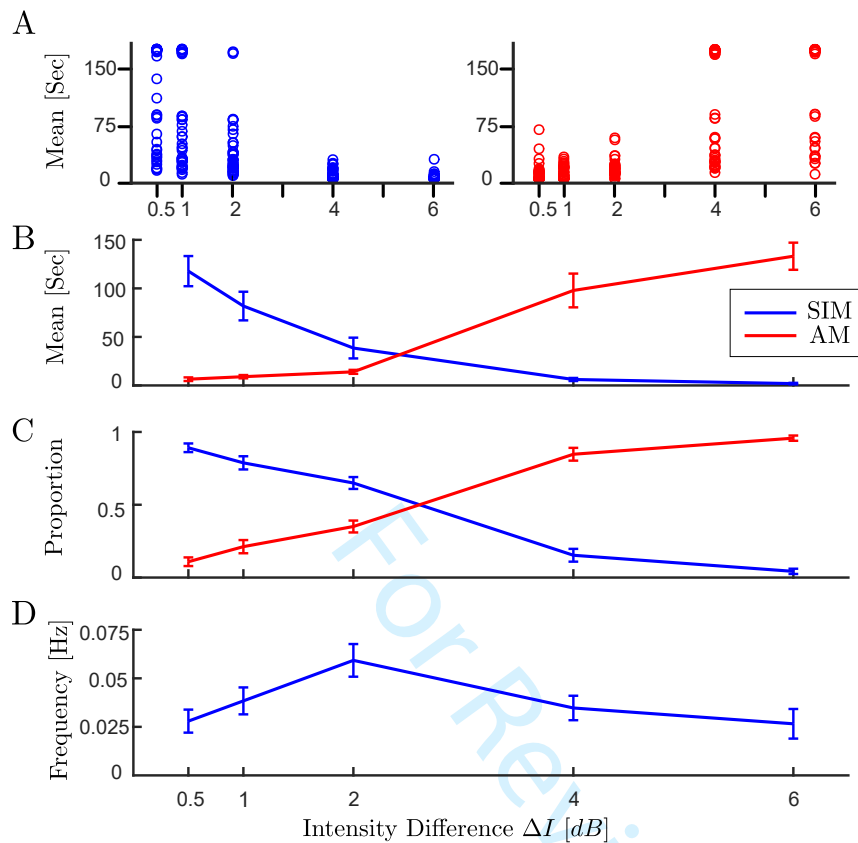

**Fig. 1** Levelt's proposition II (A) The distribution of dominance durations at each trial with different experimental conditions (45 observation per experimental condition). (B) Mean dominance duration, (C) proportion of dominance for each percept type, (D) alternation rate, as a function of intensity difference ( $\Delta I$ ).

**Table 1** Two-way repeated measure ANOVA of proportion of **both percept types (AM, SIM)** with respect to intensity difference ( $\Delta I$ ) and percept type. Analysis shows a significant effect of  $\Delta I$ :percept on the proportion.

| Source              | $df_{num}$ | $df_{den}$ | $F$    | $p$    | ges  | $p[GG]$ |
|---------------------|------------|------------|--------|--------|------|---------|
| Percept             | 1          | 41         | 0.09   | .76    | .001 |         |
| $\Delta I$          | 4          | 164        | 0.91   | .46    | .01  |         |
| $\Delta I$ :Percept | 4          | 164        | 201.85 | < .001 | .71  | < .001  |

**Table 2** One-way repeated measure ANOVA of proportion of **SIM** perception with respect to intensity difference ( $\Delta I$ ). Analysis shows a significant effect of the intensity difference on the proportion.

| Source     | $df_{num}$ | $df_{den}$ | $F$    | $p$    | ges | $p[GG]$ |
|------------|------------|------------|--------|--------|-----|---------|
| $\Delta I$ | 4          | 164        | 114.01 | < .001 | .07 | < .001  |

**Table 5** Pairwise ttest, with Bonferoni corrected p-values, on the proportions of **AM** perception with respect to intensity difference ( $\Delta I$ ).

|                | $\Delta I = 0.5$ | $\Delta I = 1$ | $\Delta I = 2$ | $\Delta I = 4$ |
|----------------|------------------|----------------|----------------|----------------|
| $\Delta I = 1$ | .08              | -              | -              | -              |
| $\Delta I = 2$ | .01              | 1.00           | -              | -              |
| $\Delta I = 4$ | < .001           | < .001         | < .001         | -              |
| $\Delta I = 6$ | < .001           | < .001         | < .001         | < .001         |

**Table 6** One-way repeated measure ANOVA of frequency of **both percept types (AM, SIM)** with respect to intensity difference ( $\Delta I$ ). Analysis shows a significant effect of  $\Delta I$  on the frequency.

| Source     | $df_{num}$ | $df_{den}$ | $F$   | $p$    | ges | $p[GG]$ |
|------------|------------|------------|-------|--------|-----|---------|
| $\Delta I$ | 4          | 176        | 15.98 | < .001 | .12 | < .001  |

**Table 7** Pairwise ttest, with Bonferoni corrected p-values, on the frequency of **both percept types (AM, SIM)** with respect to intensity difference ( $\Delta I$ ).

|                | $\Delta I = 0.5$ | $\Delta I = 1$ | $\Delta I = 2$ | $\Delta I = 4$ |
|----------------|------------------|----------------|----------------|----------------|
| $\Delta I = 1$ | 1.00             | -              | -              | -              |
| $\Delta I = 2$ | < .001           | .02            | -              | -              |
| $\Delta I = 4$ | 1.00             | 1.00           | .003           | -              |
| $\Delta I = 6$ | .82              | .82            | < .001         | 1.00           |

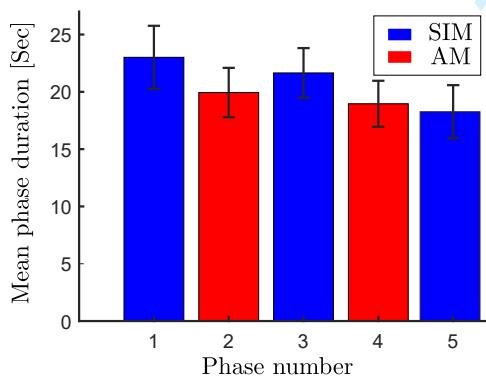**Fig. 3** Comparing the first five perceptual phases. As the result of one-way ANOVA analysis shows (Table 8), there is no significant difference between means of consecutive phase durations. Durations were averaged across all the trials in which participants had experienced five or more successive phases ( $N = 106$ ).**Table 8** One-way repeated measure ANOVA of the first five phase with respect to phase number. Analysis shows there is no significant effect of phase number on the duration of phases.

| Source | $df_{num}$ | $df_{den}$ | $F$ | $p$ | ges  | $p[GG]$ |
|--------|------------|------------|-----|-----|------|---------|
| phase  | 4          | 420        | .71 | .59 | .005 | .58     |

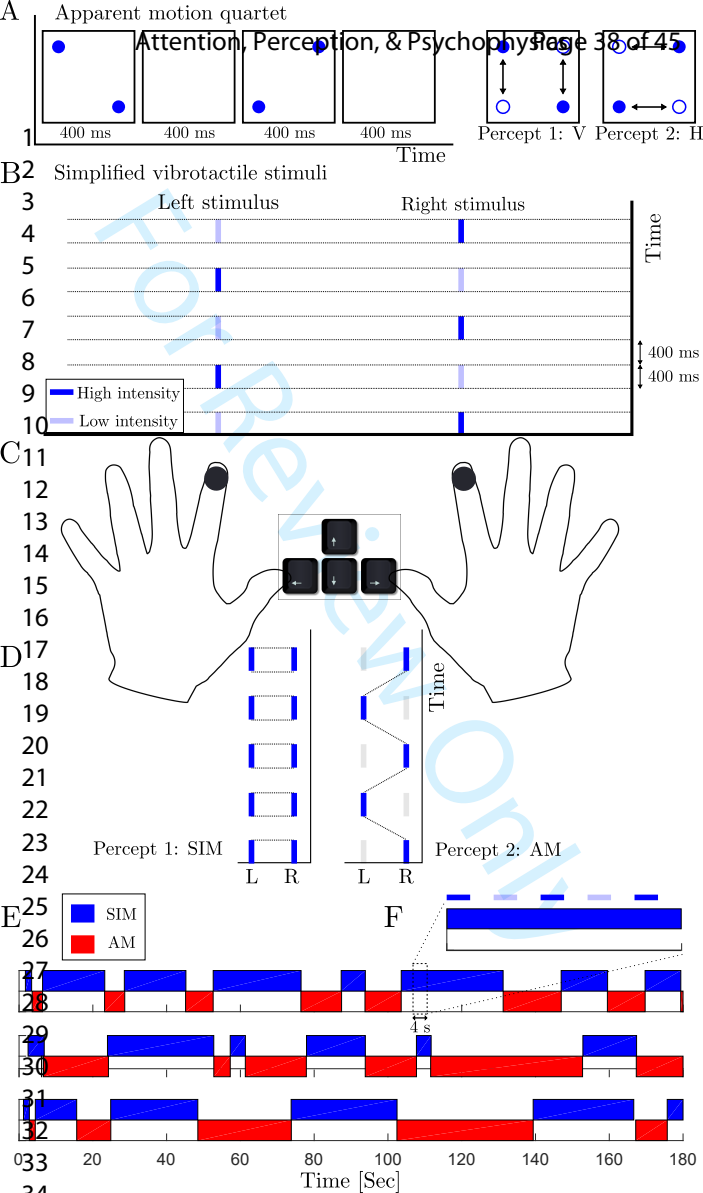

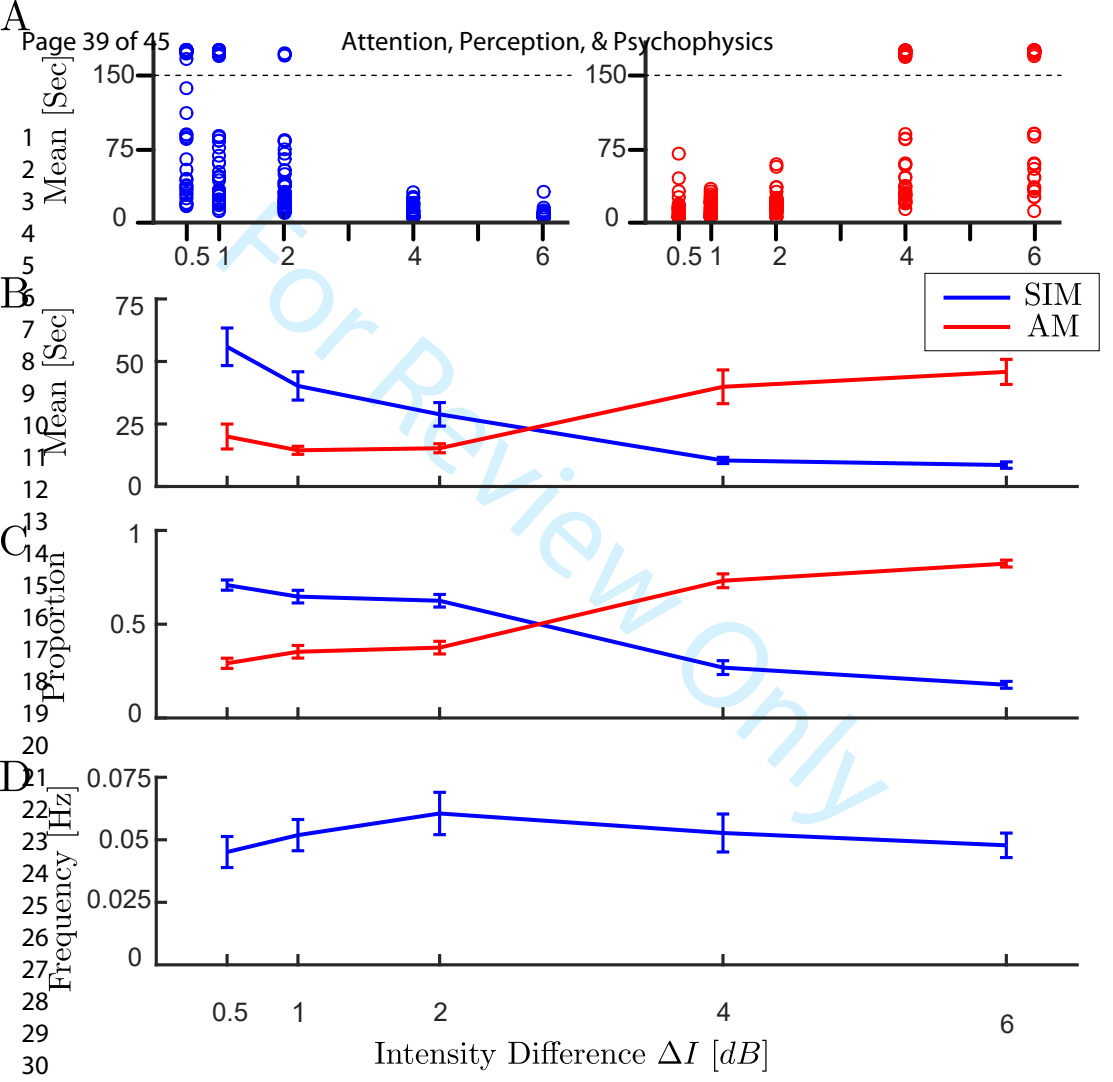

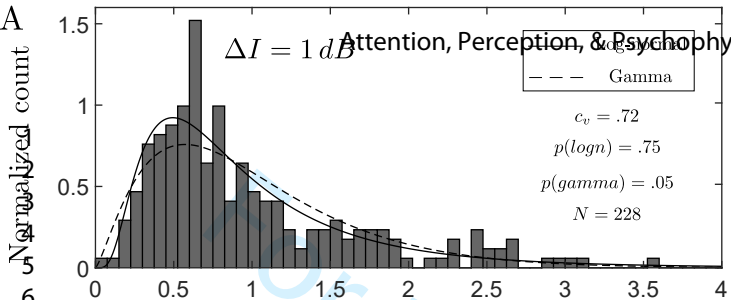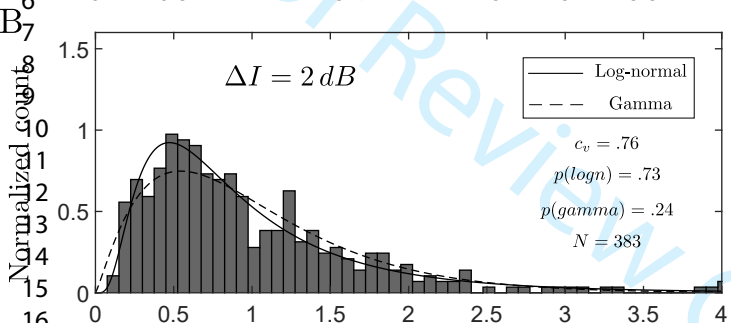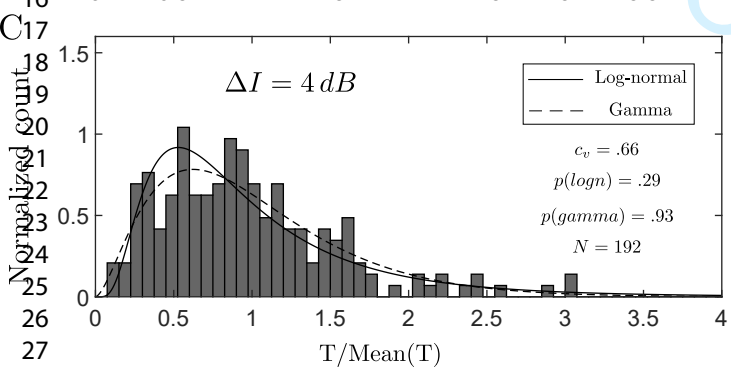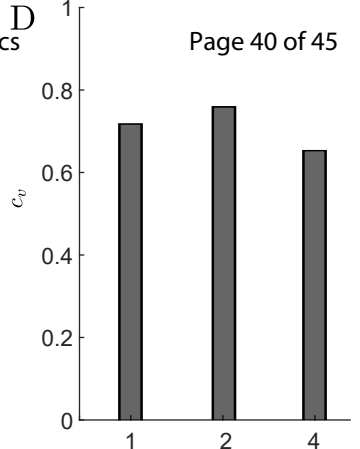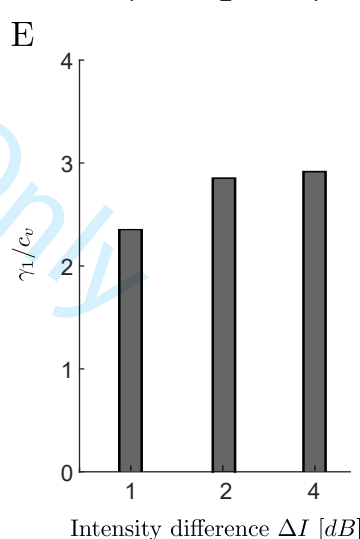

A Page 41 of 45: Lag1: SIM→AM

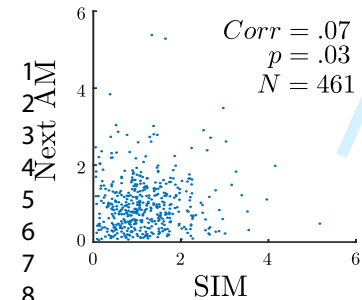

B Lag1: AM→SIM Attention, Perception, & Psychophysics

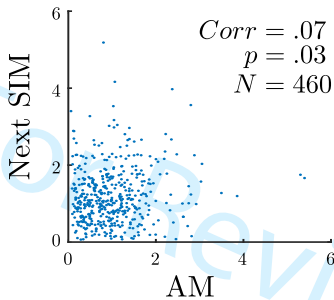

C Lag2: SIM→SIM

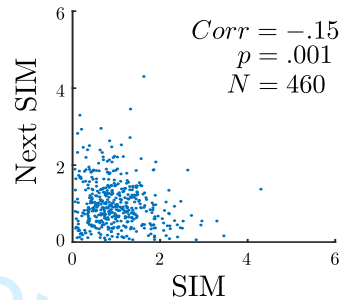

D Lag2: AM→AM

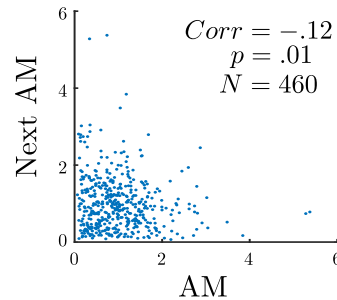

E Lag1: SIM→AM

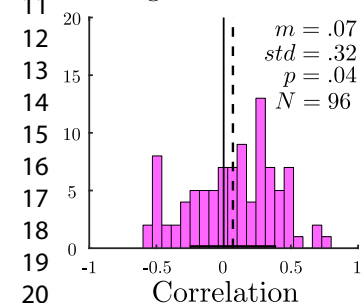

F Lag1: AM→SIM

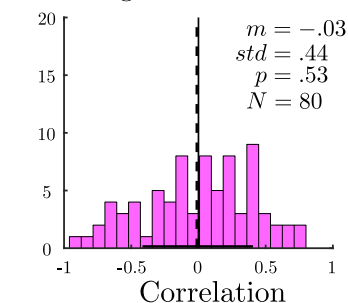

G Lag2: SIM→SIM

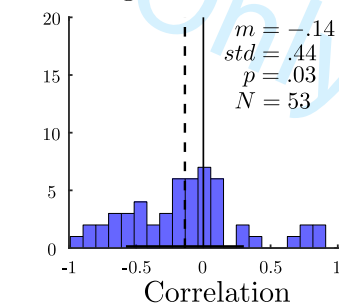

H Lag2: AM→AM

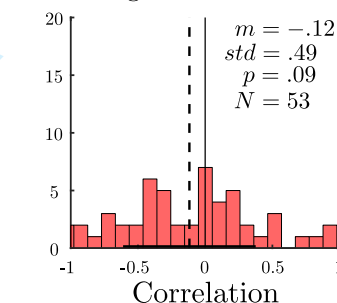

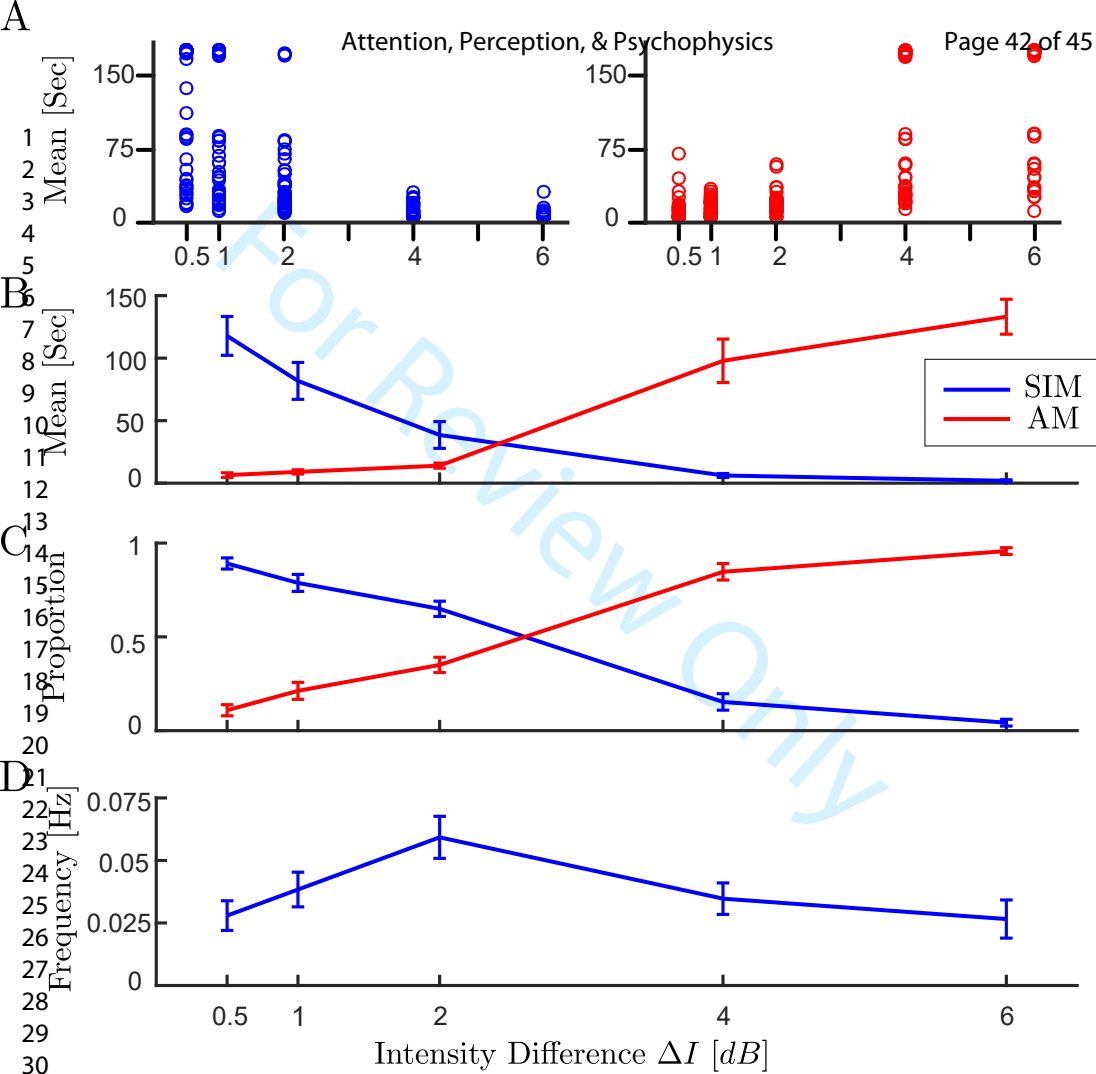



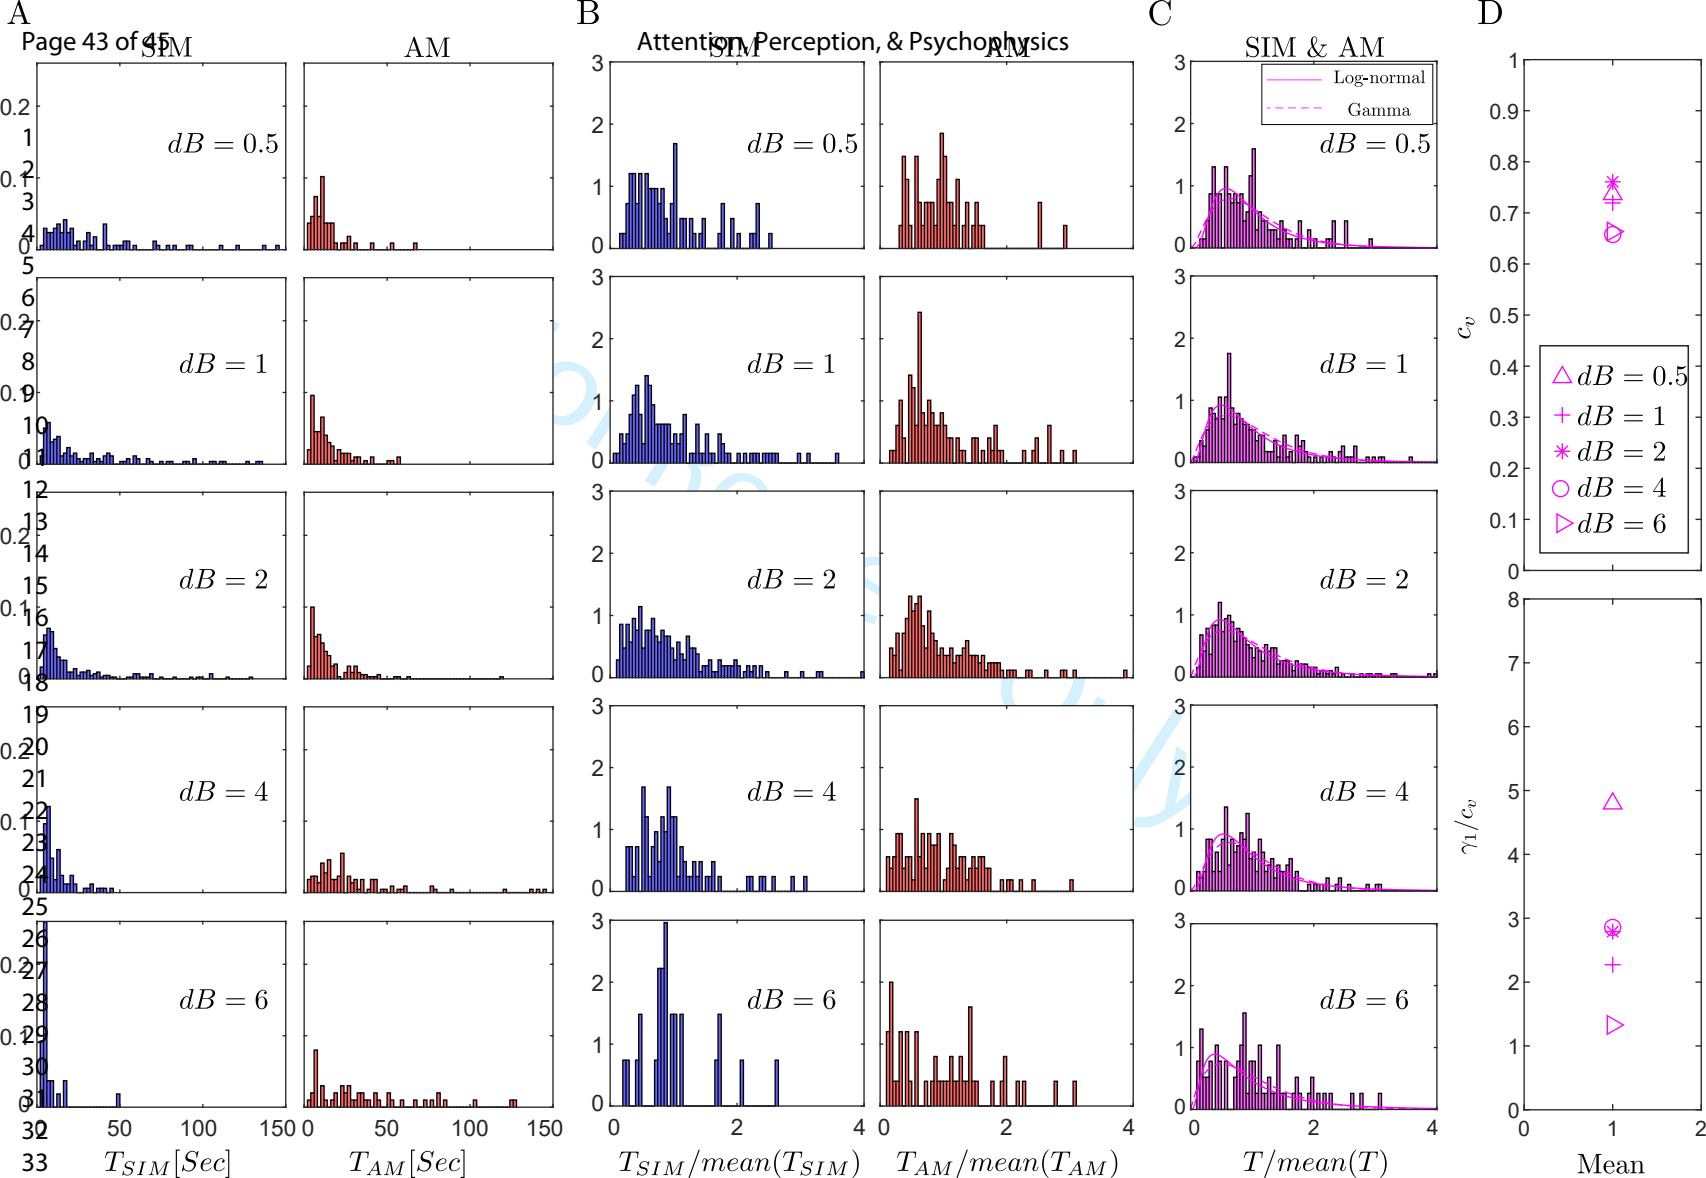

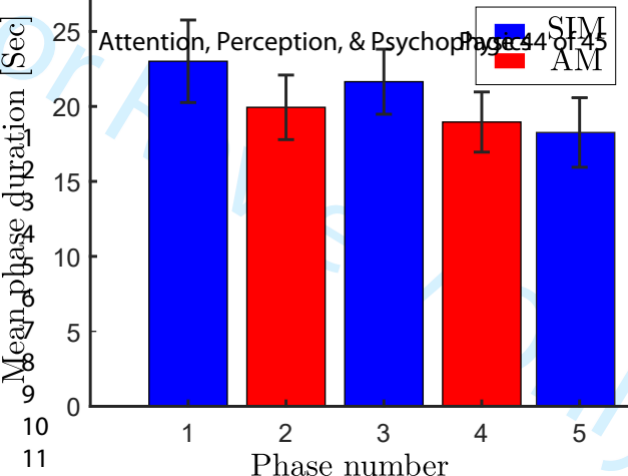

Supplement: 13414_2021_2278_MOESM1_ESM.pdf [file 13414_2021_2278_MOESM1_ESM.pdf]
